# Supplementary material for: Development of INDEL markers to discriminate all genome types rapidly in the genus Oryza
Source: PubMed Central journal article supplement — Breed Sci. 2013 Sep 1;63(3):246–54. doi: 10.1270/jsbbs.63.246 (PMC3770551; doi:10.1270/jsbbs.63.246), 2013-09-01
Supplement: 63_246_1.pdf [file 63_246_1.pdf]

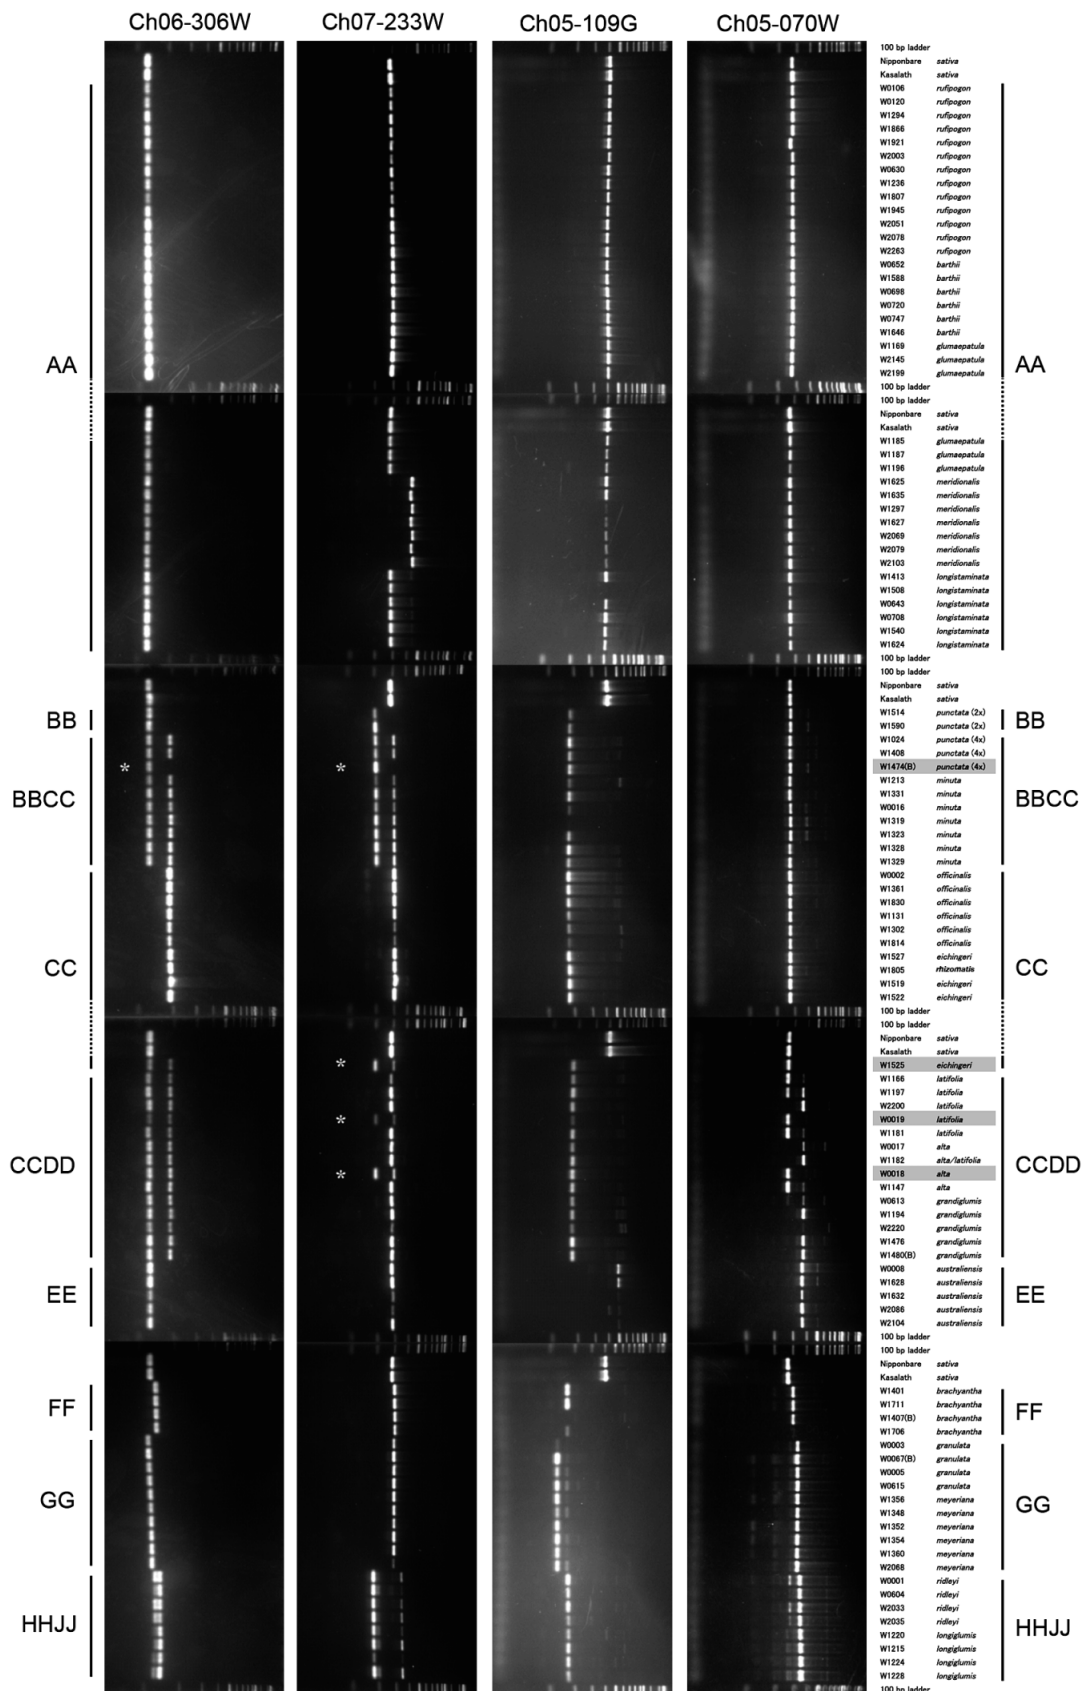

**Supplemental Fig. 1-1.** The agarose gel electrophoresis of PCR products using INDEL primers Ch06-306W, Ch07-233W, Ch05-109G and Ch05-070W. The shaded accessions indicate that the unexpected PCR products (marked with the asterisks on the image) are amplified when using several INDEL markers.

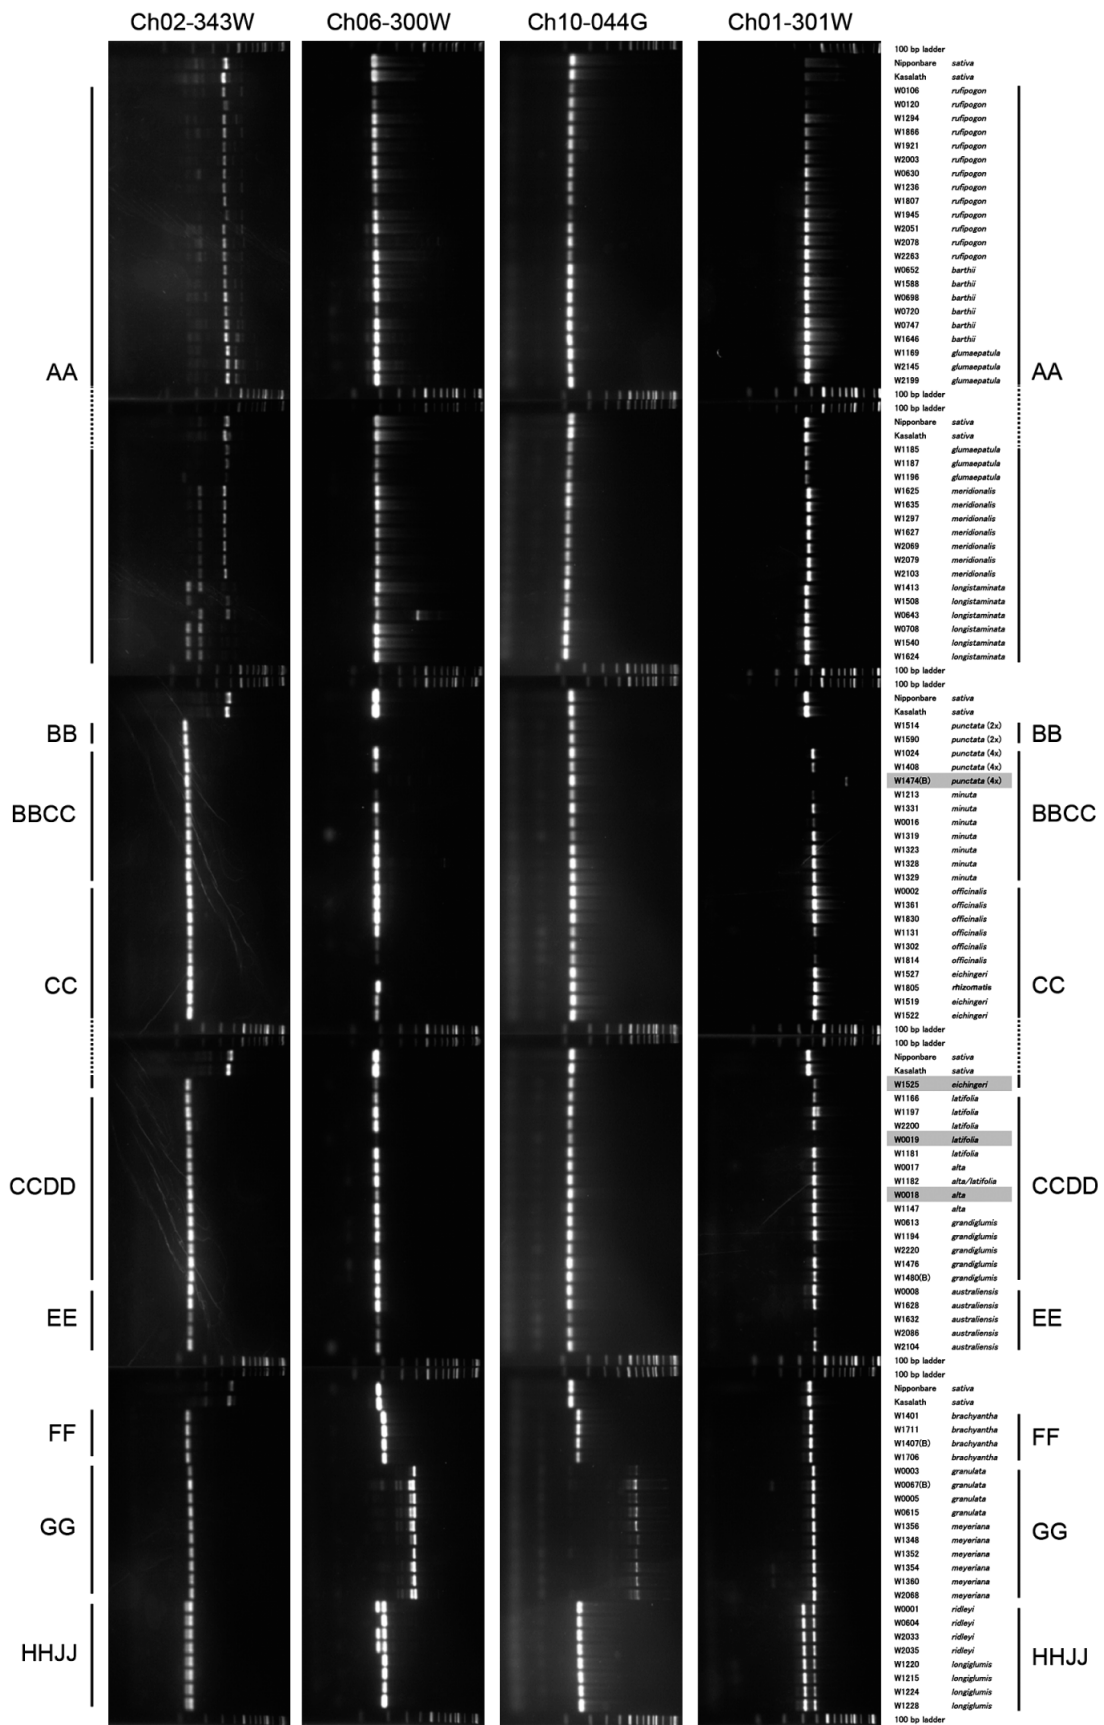

**Supplemental Fig. 1-2.** The agarose gel electrophoresis of PCR products using INDEL primers Ch02-343W, Ch06-300W, Ch10-044G and Ch01-301W.

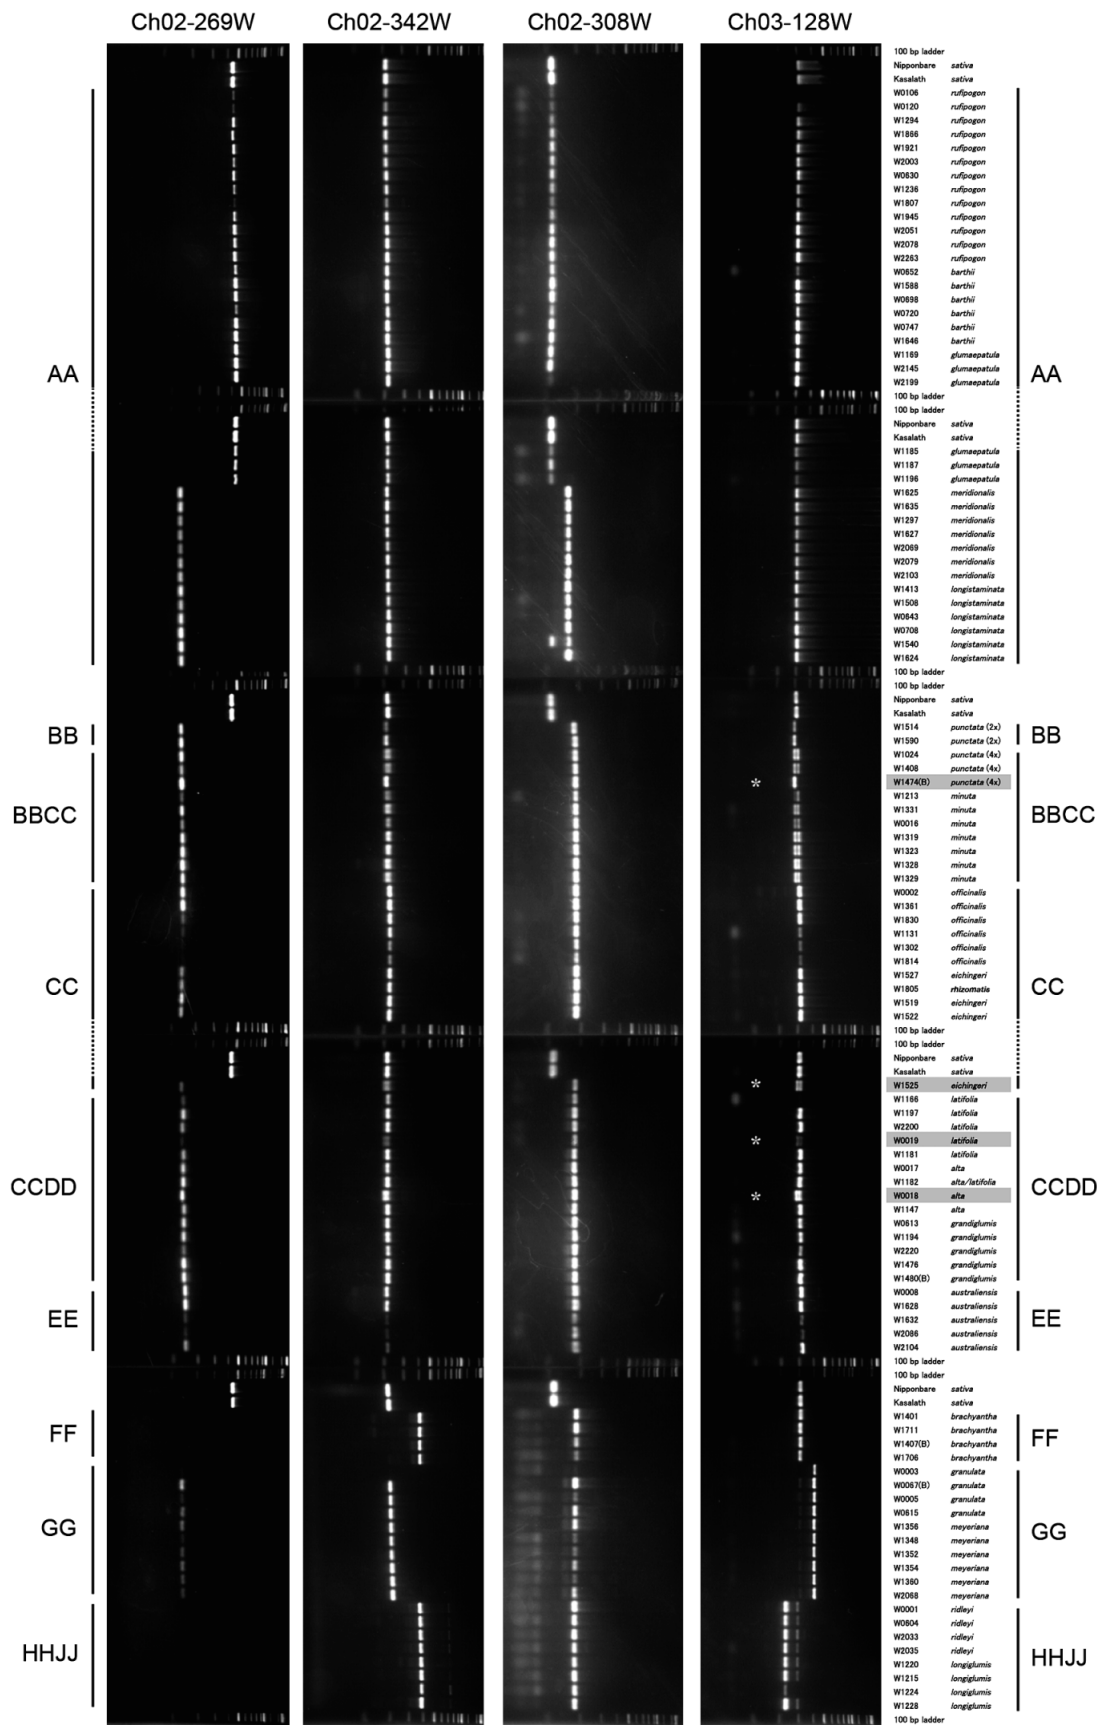

**Supplemental Fig. 1-3.** The agarose gel electrophoresis of PCR products using INDEL primers Ch02-269W, Ch02-342W, Ch02-308W and Ch03-128W.

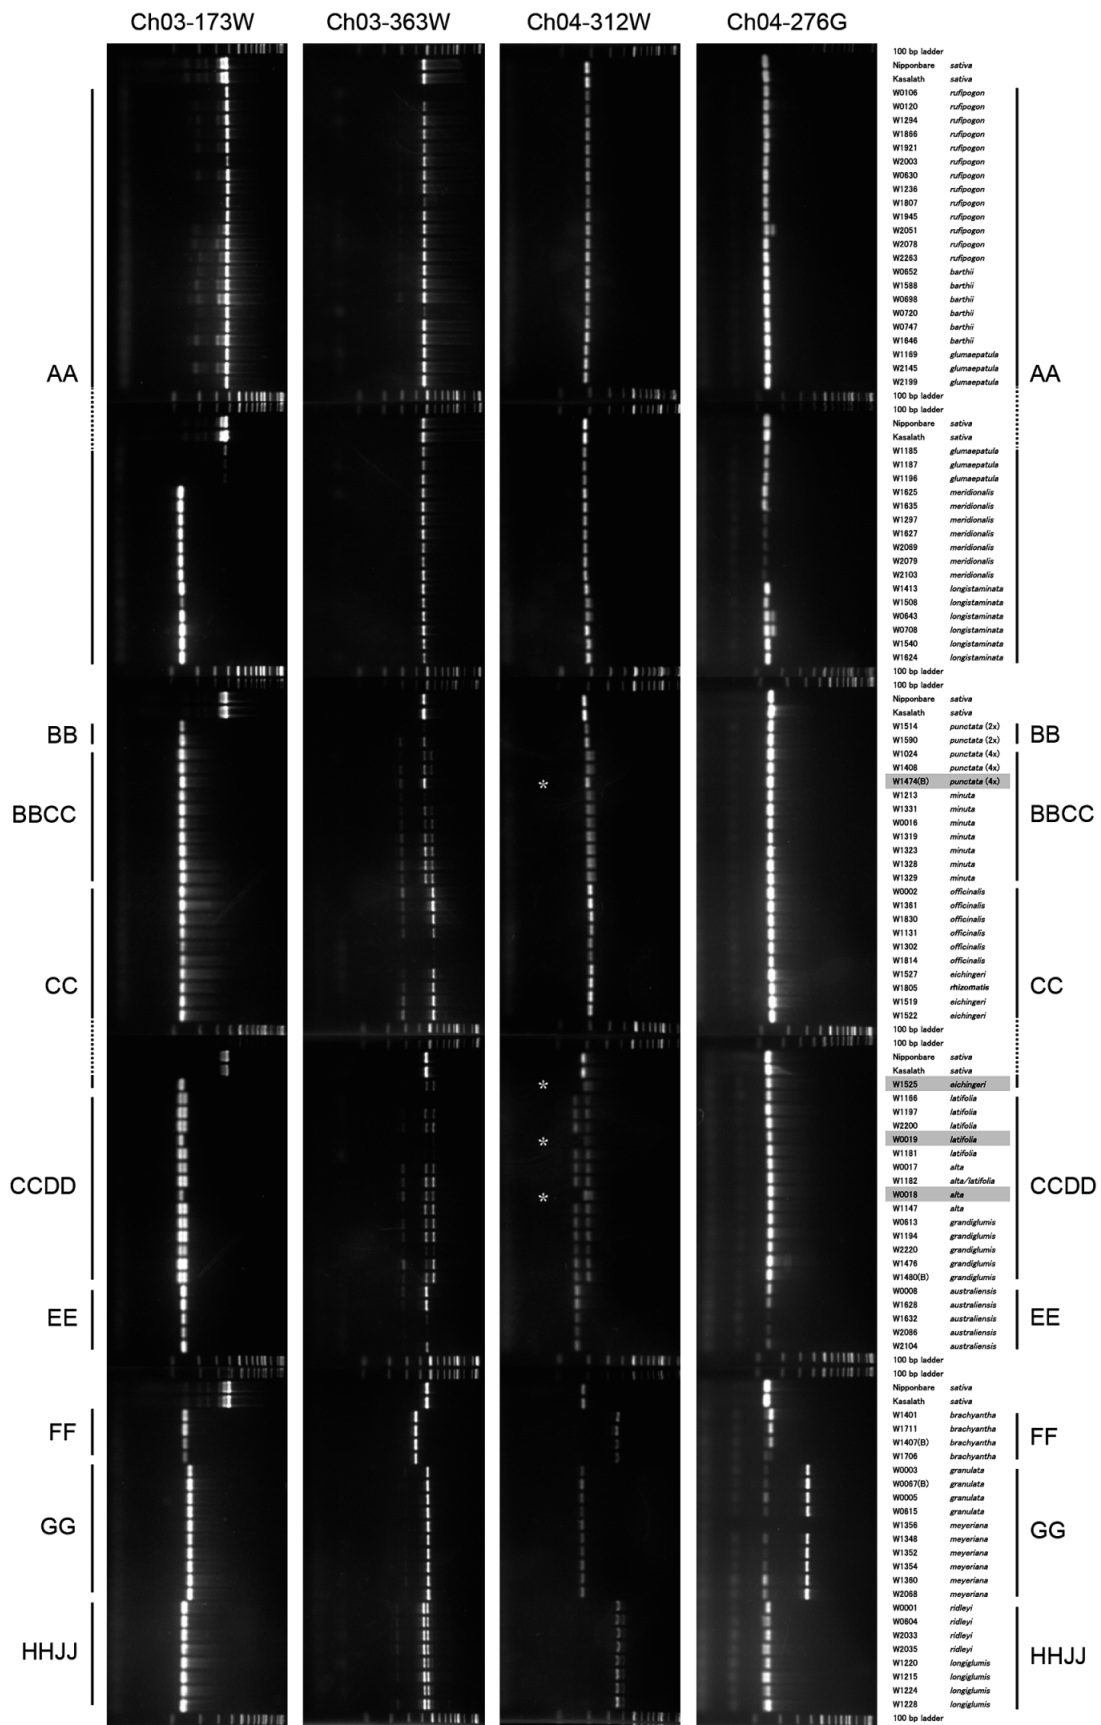

**Supplemental Fig. 1-4.** The agarose gel electrophoresis of PCR products using INDEL primers Ch03-173W, Ch03-363W, Ch04-312W and Ch04-276G.

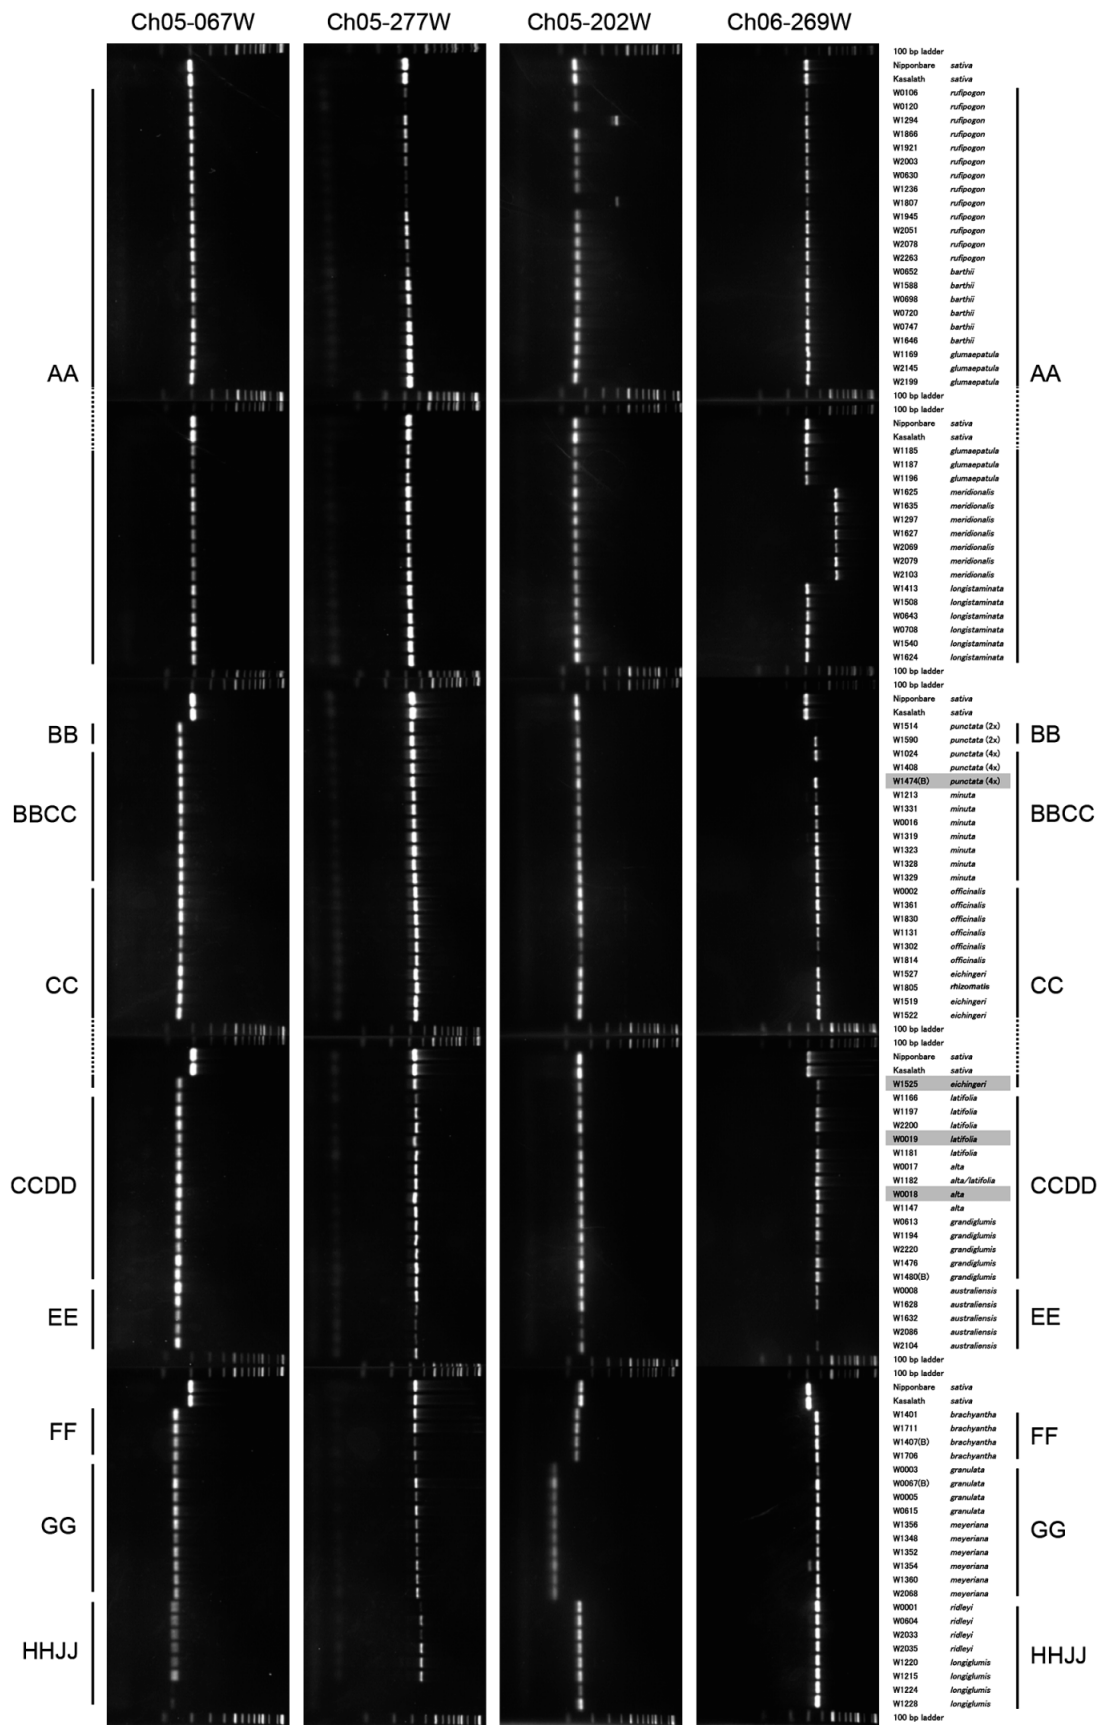

**Supplemental Fig. 1-5.** The agarose gel electrophoresis of PCR products using INDEL primers Ch05-067W, Ch05-277W, Ch05-202W and Ch06-269W.

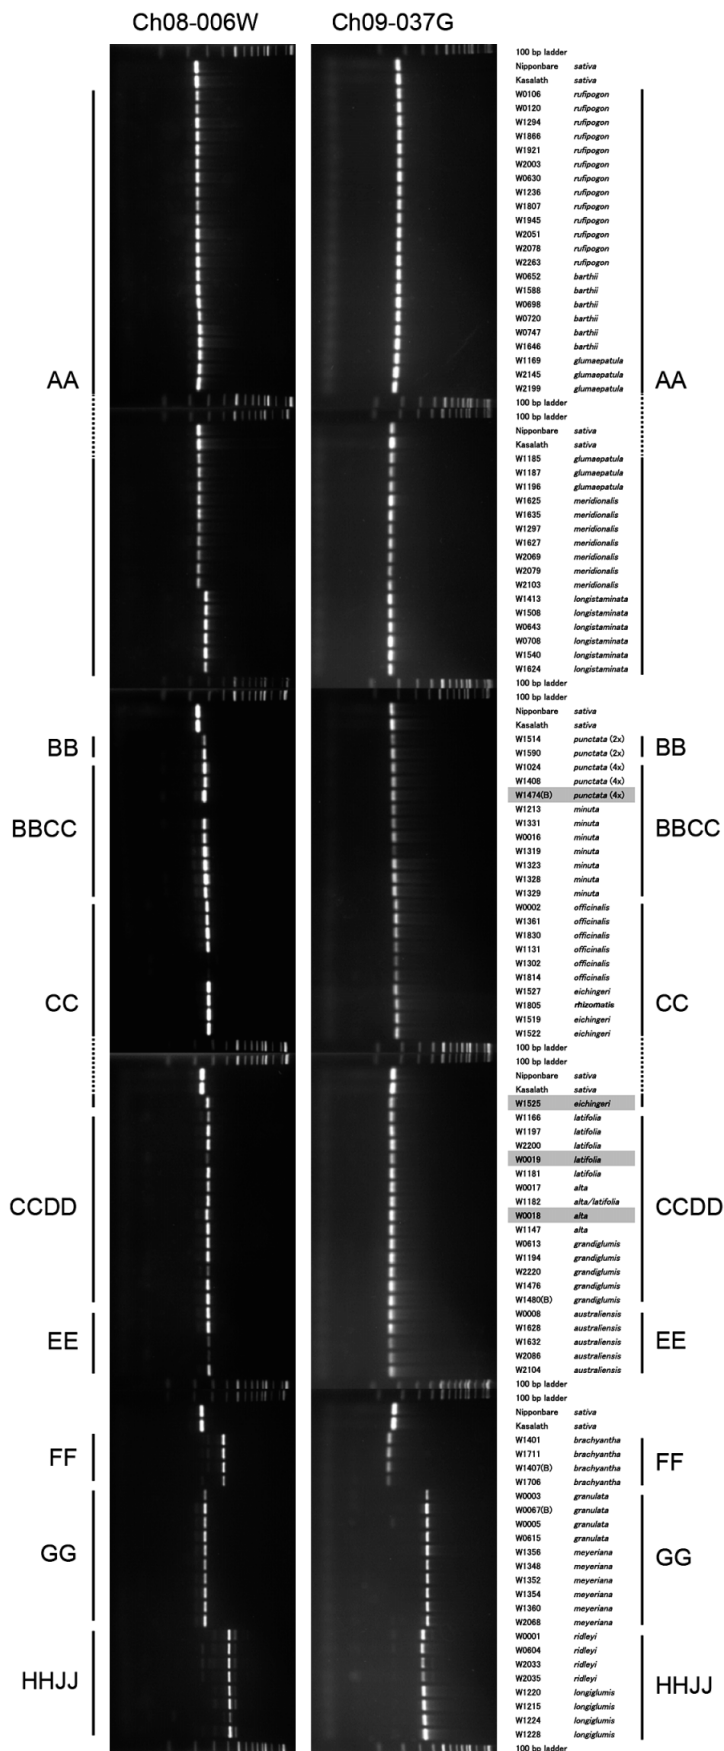

Supplemental Fig. 1-6. The agarose gel electrophoresis of PCR products using INDEL primers Ch08-006W and Ch09-037G.

```

W0652 AGGCAAAGTTT CAGAATGCAATACAGGATTTCTCTATTGGCATTGAGGTAATATACTT-----CTTGTAGTGCC-----CAGATTGGCCTTCTGTATACTCCCTCCGT 98
W1169 AGGCAAAGTTT CAGAATGCAATACAGGATTTCTCTATTGGCATTGAGGTAATATACTT-----CTTGTAGTGCC-----CAGATTGGCCTTATGTTATACTCCCTCCGT 98
Nipponbare AGGCAAAGTTT CAGAATGCAATACAGGATTTCTCTATTGGCATTGAGGTAATATACTT-----CTTGTAGTGCC-----CAGATTGGCCTTCTGTATACTCCCTCCGT 98
W0106 AGGCAAAGTTT CAGAATGCAATACAGGATTTCTCTATTGGCATTGAGGTAATATACTT-----CTTGTAGTGCC-----CAGATTGGCCTTCTGTATACTCCCTCCGT 98
W1625 AGGCAAAGTTT CAGAATGCAATACAGGATTTCTCTATTGGCATTGAGGTAATATACTT-----TGTAGTGCC-----CATGTTGGCCTTCTGTATACT----- 86
W1413 AGGCAAAGTTT CAGAATGCAATACAGGATTTCTCTATTGGCATTGAGGTAATATACTT-----CTTGTAGTGCC-----CATGTTGGCCTTCTGTATACAG----- 90
W1166_a AGGCAAAGTTT CAGAATGCAATACAGGATTTCTCTATTGGCATTGAGGTAATATACTT-----AGTGCT-----CATGTTGGCCTTCTGTATACT----- 83
W0017_a AGGCAAAGTTT CAGAATGCAATACAGGATTTCTCTATTGGCATTGAGGTAATATACTT-----AGTGCT-----CATGTTGGCCTTCTGTATACT----- 83
W0613_a AGGCAAAGTTT CAGAATGCAATACAGGATTTCTCTATTGGCATTGAGGTAATATACTT-----AGTGCT-----CATGTTGGCCTTCTGTATACT----- 83
W0002 AGGCAAAGTTT CAGAATGCAATACAGGATTTCTCTATTGGCATTGAGGTAATATACTT-----AGTGCT-----CATGTTGGCCTTCTGTATACT----- 83
W1024_a AGGCAAAGTTT CAGAATGCAATACAGGATTTCTCTATTGGCATTGAGGTAATATACTT-----AGTACT-----CATGTTGGCCTTCTGTATACT----- 83
W1213_a AGGCAAAGTTT CAGAATGCAATACAGGATTTCTCTATTGGCATTGAGGTAATATACTT-----AGTACT-----CATGTTGGCCTTCTGTATACT----- 83
W1527 AGGCAAAGTTT CAGAATGCAATACAGGATTTCTCTATTGGCATTGAGGTAATATACTT-----AGTACT-----CATGTTGGCCTTCTGTATACT----- 83
W1024_b AGGCAAAGTTT CAGAATGCAATACAGGATTTCTCTATTGGCATTGAGGTAATATACTT-----GTAACCTACTA-----CATCTTGGCTTCTGTACACAG----- 89
W1213_b AGGCAAAGTTT CAGAATGCAATACAGGATTTCTCTATTGGCATTGAGGTAATATACTT-----GTAACCTACTA-----CATCTTGGCTTCTGTACACAG----- 89
W1514 AGGCAAAGTTT CAGAATGCAATACAGGATTTCTCTATTGGCATTGAGGTAATATACTT-----GTAACCTACTA-----CATCTTGGCTTCTGTACACAG----- 89
W1166_b AGGCAAAGTTT CAGAATGCAATACAGGATTTCTCTATTGGCATTGAGGTAATATACTT-----GTAACCTACTA-----GCTCATCTTGGCTTCTGTACACAG----- 96
W0017_b AGGCAAAGTTT CAGAATGCAATACAGGATTTCTCTATTGGCATTGAGGTAATATACTT-----GTAACCTACTA-----GCTCATCTTGGCTTCTGTACACAG----- 96
W0613_b AGGCAAAGTTT CAGAATGCAATACAGGATTTCTCTATTGGCATTGAGGTAATATACTT-----GTAACCTACTA-----GCTCATCTTGGCTTCTGTACACAG----- 96
W0008 AGGCAAAGTTT CAGAATGCAATACAGGATTTCTCTATTGGCATTGAGGTAATATACTT-----GTAACCTACTA-----GCTCATCTTGGCTTCTGTACACAG----- 96
W0001 AGGCAAAGTTT CAGAATGCAATACAGGATTTCTCTATTGGCATTGAGGTAATATACTT-----GATAATTAATCTGCA-----GTCCATCTTGGCTTCTGTACAG----- 92
W1220 AGGCAAAGTTT CAGAATGCAATACAGGATTTCTCTATTGGCATTGAGGTAATATACTT-----GATAATTAATCTGCA-----GTCCATCTTGGCTTCTGTACAG----- 92
W1401 AGGCAAAGTTT CAGAATGCAATACAGGATTTCTCTATTGGCATTGAGGTAATATACTT-----GATAATTAATCTGCA-----GTCCATCTTGGCTTCTGTACAG----- 92
W0003 AGGCAAAGTTT CAGAATGCAATACAGGATTTCTCTATTGGCATTGAGGTAATATACTT-----GATAATTAATCTGCA-----GTCCATCTTGGCTTCTGTACAG----- 111
W1356 AGGCAAAGTTT CAGAATGCAATACAGGATTTCTCTATTGGCATTGAGGTAATATACTT-----GATAATTAATCTGCA-----GTCCATCTTGGCTTCTGTACAG----- 111
***** ** *

W0652 TTTAAATGTTT GACACCGTTGACTTTTTAGTACGGTTTGACCATTGCTCTATTCAAAAAATTAAGTAATATTAATCTTTTCATATCATTGATTGATTGTTAAATATACTTTCA 218
W1169 TTTAAATGTTT GACACCGTTGACTTTTTAGTACGGTTTGACCATTGCTCTATTCAAAAAATTAAGTAATATTAATCTTTTCATATCATTGATTGATTGTTAAATATACTTTCA 218
Nipponbare TTTAAATGTTT GACACCGTTGACTTTTTAGTACGGTTTGACCATTGCTCTATTCAAAAAATTAAGTAATATTAATCTTTTCATATCATTGATTGATTGTTAAATATACTTTCA 218
W0106 TTTAAATGTTT GACACCGTTGACTTTTTAGTACGGTTTGACCATTGCTCTATTCAAAAAATTAAGTAATATTAATCTTTTCATATCATTGATTGATTGTTAAATATACTTTCA 218
W1625 -----
W1413 -----
W1166_a -----
W0017_a -----
W0613_a -----
W0002 -----
W1024_a -----
W1213_a -----
W1527 -----
W1024_b -----
W1213_b -----
W1514 -----
W1166_b -----
W0017_b -----
W0613_b -----
W0008 -----
W0001 -----
W1220 -----
W1401 -----
W0003 -----
W1356 -----

W0652 TGTACACATAGTTTTAAATATTTTACAAAATTTTTTGAATAAGACGAACGGTCAAAACATGTGCTAAAAAGTCAACGGTGTCAAAACATTTTGAACGGAGGGATACAAATTT---AAC 335
W1169 TGTACACATAGTTTTAAATATTTTACAAAATTTTTTGAATAAGACGAACGGTCAAAACATGTGCTAAAAAGTCAACGGTGTCAAAACATTTTGAACGGAGGGATACAAATTT---AAC 335
Nipponbare TGTACACATAGTTTTAAATATTTTACAAAATTTTTTGAATAAGACGAACGGTCAAAACATGTGCTAAAAAGTCAACGGTGTCAAAACATTTTGAACGGAGGGATACAAATTT---AAC 335
W0106 TGTACACATAGTTTTAAATATTTTACAAAATTTTTTGAATAAGACGAACGGTCAAAACATGTGCTAAAAAGTCAACGGTGTCAAAACATTTTGAACGGAGGGATACAAATTT---AAC 335
W1625 -----AG-----TAAT---AAC 95
W1413 -----ATATT---AAC 90
W1166_a -----TATT---AAC 90
W0017_a -----TATT---AAC 90
W0613_a -----TATT---AAC 90
W0002 -----TATT---AAC 90
W1024_a -----TATT---AAC 90
W1213_a -----TATT---AAC 90
W1527 -----TATT---AAC 90
W1024_b -----TGTT---AAC 96
W1213_b -----TGTT---AAC 96
W1514 -----TGTT---AAC 96
W1166_b -----TGTTAAAAAAC 106
W0017_b -----TGTTAAAAAAC 106
W0613_b -----TGTTAAAAAAC 106
W0008 -----TGTT---AAC 103
W0001 -----TGTT---AAC 99
W1220 -----TGTT---AAC 99
W1401 -----CGTT---AAC 99
W0003 -----TGTT---AAC 118
W1356 -----TGTT---AAC 118
:* ***

W0652 ATGCTAGTCCCTTTCTTAGATGGCTATTGCCGCTAAGACACA 377
W1169 ATGCTAGTCCCTTTCTTAGATGGCTATTGCCGCTAAGACACA 377
Nipponbare ATGCTAGTCCCTTTCTTAGATGGCTATTGCCGCTAAGACACA 377
W0106 ATGCTAGTCCCTTTCTTAGATGGCTATTGCCGCTAAGACACA 377
W1625 ATTCCTAGTCCCTTTCTTAGATGGCTATTGCCGCTAAGACACA 137
W1413 ATTCCTAGTCCCTTTCTTAGATGGCTATTGCCGCTAAGACACA 140
W1166_a ATGCTATTCCCTTTCTTAGATGGCTATTGCCGCTAAGACACA 132
W0017_a ATGCTATTCCCTTTCTTAGATGGCTATTGCCGCTAAGACACA 132
W0613_a ATGCTATTCCCTTTCTTAGATGGCTATTGCCGCTAAGACACA 132
W0002 ATGCTATTCCCTTTCTTAGATGGCTATTGCCGCTAAGACACA 132
W1024_a ATGCTATTCCCTTTCTTAGATGGCTATTGCCGCTAAGACACA 132
W1213_a ATGCTATTCCCTTTCTTAGATGGCTATTGCCGCTAAGACACA 132
W1527 ATGCTATTCCCTTTCTTAGATGGCTATTGCCGCTAAGACACA 132
W1024_b ATGCTATTCCCTTTCTTAGATGGCTATTGCCGCTAAGACACA 138
W1213_b ATGCTATTCCCTTTCTTAGATGGCTATTGCCGCTAAGACACA 138
W1514 ATGCTATTCCCTTTCTTAGATGGCTATTGCCGCTAAGACACA 138
W1166_b ATGCTATTCCCTTTCTTAGATGGCTATTGCCGCTAAGACACA 148
W0017_b ATGCTATTCCCTTTCTTAGATGGCTATTGCCGCTAAGACACA 148
W0613_b ATGCTATTCCCTTTCTTAGATGGCTATTGCCGCTAAGACACA 148
W0008 ATGCTATTCCCTTTCTTAGATGGCTATTGCCGCTAAGACACA 145
W0001 ATGCTATTCCCTTTCTTAGATGGCTATTGCCGCTAAGACACA 141
W1220 ATGCTATTCCCTTTCTTAGATGGCTATTGCCGCTAAGACACA 141
W1401 ATGCTATTCCCTTTCTTAGATGGCTATTGCCGCTAAGACACA 141
W0003 ATGCTATTCCCTTTCTTAGATGGCTATTGCCGCTAAGACACA 160
W1356 ATGCTATTCCCTTTCTTAGATGGCTATTGCCGCTAAGACACA 160
* ** *

```

**Supplemental Fig. 2.** The DNA sequence alignment of PCR products from the syntenic locus using the INDEL marker Ch03-173W. The large deletions are found in the fragments from *meridionalis* (W1625), *longistaminata* (W1413) and non-AA genome type species. The both terminal sequences enclosed with open squares are forward and reverse primers of Ch03-173W, respectively. In the accession numbers, the “a” and “b” suffixed to the same accession indicate that they are experimental replications.

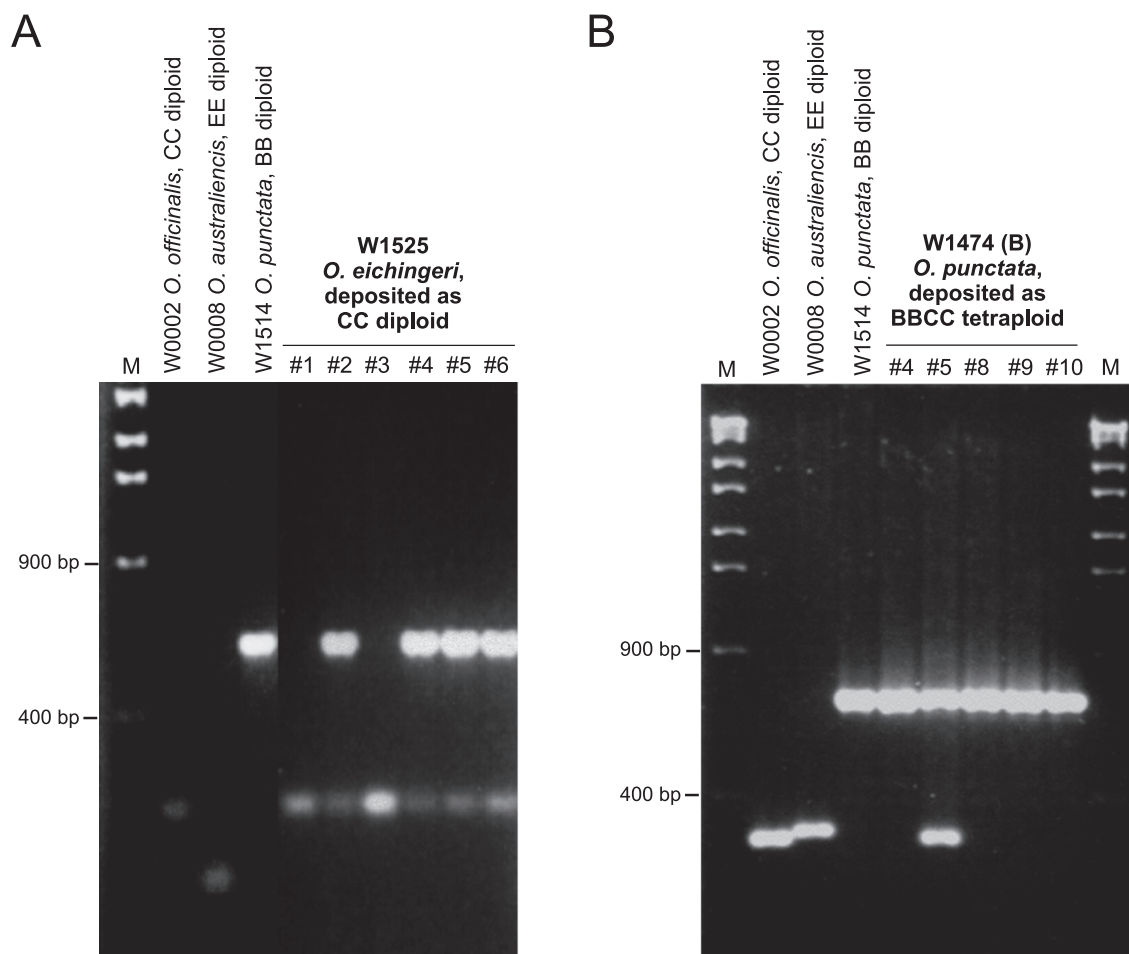

| Sample plant No. | Median of fluorescent intensity |             | Normalized (a/b) |
|------------------|---------------------------------|-------------|------------------|
|                  | Sample (a)                      | Haploid (b) |                  |
| W1525 #1         | 25.96                           | 9.89        | 2.6              |
| W1525 #2         | 50.37                           | 10.02       | 5.0              |
| W1525 #3         | 27.78                           | 10.35       | 2.7              |
| W1525 #4         | 43.01                           | 8.80        | 4.9              |
| W1525 #5         | 37.28                           | 7.91        | 4.7              |
| W1525 #6         | 42.29                           | 8.68        | 4.9              |

| Sample plant No. | Median of fluorescent intensity |             | Normalized (a/b) |
|------------------|---------------------------------|-------------|------------------|
|                  | Sample (a)                      | Haploid (b) |                  |
| W1474(B) #4      | 26.51                           | 10.22       | 2.6              |
| W1474(B) #5      | 46.00                           | 9.96        | 4.6              |
| W1474(B) #8      | 28.06                           | 11.64       | 2.4              |
| W1474(B) #9      | 25.54                           | 10.62       | 2.4              |
| W1474(B) #10     | 29.26                           | 11.40       | 2.6              |

**Supplemental Fig. 3.** The wild *Oryza* accessions which segregated two different ploidies. In each panel, the top photo indicates the polymorphic INDEL pattern on the 3% agarose-gel electrophoresis. M; DNA size marker ( $\lambda$  DNA/*StyI*). The left three lanes are the standard diploid accessions; W0002 is *O. officinalis*, CC; W0008 is *O. australiensis*, EE; W1514 is *O. punctata*, BB. It is supposed that DD genome is originated from EE genome (Ge *et al.* 1999), and so *O. australiensis* is used as a standard for evaluation of DD genome bands. The bottom table indicates the results of flow-cytometric analysis for nuclear DNA contents. The median of fluorescent intensity from the nuclei of each plant (a) was normalized with that of the haploid plant (b). (A) W0002, the accession deposited as CC diploid species, *O. eichingeri*. Two of 6 plants were confirmed to be the CC diploid, while 4 plants were the tetraploid, probably the BBCC type. (B) W1474, the accession deposited as BBCC tetraploid species, *O. punctata*. One of 5 plants were confirmed to be the BBCC tetraploid, while 4 plants were the BB diploid.
