# Supplementary material for: Development of INDEL markers to discriminate all genome types rapidly in the genus Oryza
Source: PubMed Central journal article supplement — Breed Sci. 2013 Sep 1;63(3):246–54. doi: 10.1270/jsbbs.63.246 (PMC3770551; doi:10.1270/jsbbs.63.246), 2013-09-01
Supplement: 63_246_2.pdf [file 63_246_2.pdf]

Supplemental Table 1. Continued.

| Accession No. | Method* | Gel fragment size in each INDEL marker (bp)** |      |      |      |      |      |      |      |      |      |      |      |      |      |      |      |      |      |      |      |      |      |
|---------------|---------|-----------------------------------------------|------|------|------|------|------|------|------|------|------|------|------|------|------|------|------|------|------|------|------|------|------|
|               |         | 1                                             | 2    | 2    | 2    | 2    | 3    | 3    | 3    | 4    | 4    | 5    | 5    | 5    | 5    | 5    | 6    | 6    | 6    | 7    | 8    | 9    | 10   |
|               |         | -301                                          | -269 | -308 | -342 | -343 | -128 | -173 | -363 | -276 | -312 | -067 | -070 | -109 | -202 | -277 | -269 | -300 | -306 | -233 | -006 | -037 | -044 |
| W1413         | Gel     | 352                                           | 285  | 160  | 209  | 135  | 298  | 130  | 461  | 132  | 200  | 195  | 263  | 398  | 148  | 326  | 299  | 180  | 124  | 281  | 270  | 161  | 121  |
|               | Frag    | 355                                           | 287  | -    | 216  | 156  | 301  | 136  | -    | 194  | 200  | -    | 403  | 151  | 331  | 302  | 188  | 127  | -    | -    | -    | 165  | 125  |
| W1508         | Gel     | -                                             | -    | -    | -    | 210  | -    | -    | -    | -    | -    | -    | -    | -    | -    | -    | -    | -    | -    | -    | -    | -    | -    |
|               | Frag    | -                                             | -    | -    | -    | 207  | -    | -    | -    | -    | -    | -    | -    | -    | -    | -    | -    | -    | -    | -    | -    | -    | -    |
| W0643         | Gel     | 352                                           | 285  | 160  | 209  | 210  | 298  | 130  | 461  | 132  | 200  | 195  | 263  | 398  | 148  | 326  | 299  | 180  | 124  | 281  | 270  | 161  | 121  |
|               | Frag    | 356                                           | 288  | -    | 216  | 207  | 301  | 137  | -    | 194  | 200  | 264  | -    | 151  | 331  | 302  | 188  | 128  | 289  | 275  | 165  | 126  | -    |
| W0708         | Gel     | -                                             | -    | -    | -    | 370  | -    | -    | -    | -    | -    | -    | -    | -    | -    | -    | -    | -    | -    | -    | -    | -    | -    |
|               | Frag    | -                                             | -    | -    | -    | 384  | -    | -    | -    | -    | -    | -    | -    | -    | -    | -    | -    | -    | -    | -    | -    | -    | -    |
| W1540         | Gel     | 352                                           | 285  | 160  | 209  | 135  | 298  | 130  | 461  | 132  | 200  | 195  | 263  | 398  | 148  | 326  | 299  | 180  | 124  | 281  | 270  | 161  | 121  |
|               | Frag    | 356                                           | 288  | -    | 216  | 155  | 301  | 137  | 468  | 138  | 201  | 200  | 264  | -    | 150  | 331  | 302  | -    | 128  | 289  | 275  | 166  | 125  |
| W1624         | Gel     | -                                             | -    | -    | -    | 210  | -    | -    | -    | -    | -    | -    | -    | -    | -    | -    | -    | -    | -    | -    | -    | -    | -    |
|               | Frag    | -                                             | -    | -    | -    | 207  | -    | -    | -    | -    | -    | -    | -    | -    | -    | -    | -    | -    | -    | -    | -    | -    | -    |
| W1514         | Gel     | 410                                           | 124  | 176  | 209  | 135  | 280  | 130  | 461  | 132  | 200  | 145  | 263  | 180  | 148  | 326  | 357  | 180  | 124  | 200  | 270  | 161  | 121  |
|               | Frag    | 374                                           | 127  | 178  | 209  | -    | 289  | 134  | -    | 138  | 201  | 140  | 265  | -    | 151  | 321  | 373  | -    | -    | 201  | 267  | -    | 127  |
| W1590         | Gel     | 410                                           | 124  | 176  | 209  | 135  | 280  | 130  | 461  | 132  | 200  | 145  | 263  | 180  | 148  | 326  | 357  | 180  | 124  | 200  | 270  | 161  | 121  |
|               | Frag    | 370                                           | 128  | -    | 210  | 142  | 289  | 134  | -    | 138  | 203  | 140  | 265  | 173  | 151  | 321  | 370  | -    | 127  | 201  | -    | 166  | 127  |
| W1024         | Gel     | 410                                           | 124  | 176  | 209  | 135  | 280  | 130  | 461  | 132  | 200  | 145  | 263  | 180  | 148  | 326  | 357  | 180  | 124  | 200  | 270  | 161  | 121  |
|               | Frag    | -                                             | 129  | 181  | 210  | 141  | 289  | 134  | -    | 138  | 209  | 140  | 265  | 173  | 151  | 321  | 369  | 183  | 126  | 201  | -    | 166  | 134  |
| W1408         | Gel     | -                                             | -    | -    | -    | 298  | -    | 550  | -    | -    | -    | -    | -    | -    | -    | -    | -    | -    | 185  | 300  | -    | -    | -    |
|               | Frag    | -                                             | -    | -    | -    | 307  | -    | -    | -    | -    | -    | -    | -    | -    | -    | -    | -    | -    | 189  | -    | -    | -    | -    |
| W1474         | Gel     | 410                                           | 124  | 176  | 209  | 135  | 280  | 130  | 461  | 132  | 200  | 145  | 263  | 180  | 148  | 326  | 357  | 180  | 124  | 200  | 270  | 161  | 121  |
|               | Frag    | 395                                           | 129  | 181  | 210  | 141  | 290  | 134  | -    | 138  | 209  | 140  | 265  | -    | 151  | 327  | 373  | 182  | 126  | 201  | -    | 134  | -    |
| W1213         | Gel     | -                                             | -    | -    | -    | 298  | -    | 550  | -    | -    | -    | -    | -    | -    | -    | -    | -    | -    | 185  | 300  | -    | -    | -    |
|               | Frag    | -                                             | -    | -    | -    | 307  | -    | -    | -    | -    | -    | -    | -    | -    | -    | -    | -    | -    | 189  | 306  | -    | -    | -    |
| W0016         | Gel     | 410                                           | 124  | 176  | 209  | 135  | 280  | 130  | 461  | 132  | 200  | 145  | 263  | 180  | 148  | 326  | 357  | 180  | 124  | 200  | 270  | 161  | 121  |
|               | Frag    | 373                                           | 129  | -    | -    | 141  | -    | 134  | -    | -    | 209  | 140  | 265  | -    | 150  | 330  | 368  | 183  | 126  | 201  | -    | -    | 126  |
| W1319         | Gel     | -                                             | -    | -    | -    | 298  | -    | 550  | -    | -    | -    | -    | -    | -    | -    | -    | -    | -    | 185  | 300  | -    | -    | -    |
|               | Frag    | -                                             | -    | -    | -    | 308  | -    | -    | -    | -    | -    | -    | -    | -    | -    | -    | -    | -    | 191  | -    | -    | -    | -    |
| W1323         | Gel     | 410                                           | 124  | 176  | 209  | 135  | 280  | 130  | 461  | 132  | 200  | 145  | 263  | 180  | 148  | 326  | 357  | 180  | 124  | 200  | 270  | 161  | 121  |
|               | Frag    | 395                                           | 129  | 181  | 213  | 141  | 290  | 134  | -    | 138  | 209  | -    | 265  | 172  | 150  | -    | 368  | 183  | 127  | 201  | -    | 166  | 127  |
| W1328         | Gel     | -                                             | -    | -    | -    | 298  | -    | 550  | -    | -    | -    | -    | -    | -    | -    | -    | -    | -    | 185  | 300  | -    | -    | -    |
|               | Frag    | -                                             | -    | -    | -    | 308  | -    | -    | -    | -    | -    | -    | -    | -    | -    | -    | -    | -    | 190  | -    | -    | -    | -    |
| W1329         | Gel     | 410                                           | 124  | 176  | 209  | 135  | 280  | 130  | 461  | 132  | 200  | 145  | 263  | 180  | 148  | 326  | 357  | 180  | 124  | 200  | 270  | 161  | 121  |
|               | Frag    | 395                                           | 129  | 181  | -    | -    | 290  | 134  | -    | 138  | 209  | 140  | 266  | 173  | 151  | 333  | 373  | 183  | -    | 201  | -    | 169  | 126  |
| W0002         | Gel     | -                                             | -    | -    | -    | 298  | -    | 550  | -    | -    | -    | -    | -    | -    | -    | -    | -    | -    | 185  | 300  | -    | -    | -    |
|               | Frag    | -                                             | -    | -    | -    | 307  | -    | -    | -    | -    | -    | -    | -    | -    | -    | -    | -    | -    | 306  | -    | -    | -    | -    |
| W1361         | Gel     | 410                                           | 124  | 176  | 209  | 135  | 298  | 130  | 550  | 132  | 200  | 145  | 263  | 180  | 148  | 326  | 357  | 180  | 182  | 300  | 270  | 161  | 121  |
|               | Frag    | 395                                           | 129  | 181  | 220  | 144  | 308  | 128  | -    | 138  | 209  | 140  | 265  | 174  | 150  | 331  | 373  | 183  | 187  | 306  | -    | 171  | 126  |
| W1830         | Gel     | 410                                           | 124  | 176  | 209  | 135  | 298  | 130  | 550  | 132  | 200  | 145  | 263  | 180  | 148  | 326  | 357  | 180  | 182  | 300  | 270  | 161  | 121  |
|               | Frag    | 395                                           | 129  | 182  | 220  | 144  | 308  | 128  | -    | 138  | 209  | 140  | 265  | 174  | 150  | 330  | 373  | 183  | 186  | 306  | 277  | 171  | 128  |
| W1131         | Gel     | 410                                           | 124  | 176  | 209  | 135  | 298  | 130  | 550  | 132  | 200  | 145  | 263  | 180  | 148  | 326  | 357  | 180  | 182  | 300  | 270  | 161  | 121  |
|               | Frag    | 395                                           | 129  | -    | 220  | 144  | 308  | 128  | -    | 138  | 209  | 140  | 262  | -    | 150  | 330  | 373  | -    | 187  | 306  | 277  | 171  | 128  |
| W1302         | Gel     | 410                                           | 124  | 176  | 209  | 135  | 298  | 130  | 550  | 132  | 200  | 145  | 263  | 180  | 148  | 326  | 357  | 180  | 182  | 300  | 270  | 161  | 121  |
|               | Frag    | 395                                           | 129  | -    | 220  | 144  | 308  | 128  | -    | 138  | 208  | 140  | 266  | -    | 151  | 331  | 373  | 183  | 187  | 306  | -    | -    | 128  |
| W1814         | Gel     | 410                                           | 124  | 176  | 209  | 135  | 298  | 130  | 550  | 132  | 200  | 145  | 263  | 180  | 148  | 326  | 357  | 180  | 182  | 300  | 270  | 161  | 121  |
|               | Frag    | -                                             | 129  | -    | 220  | 144  | 308  | 128  | -    | 138  | 208  | 140  | 266  | -    | 151  | 331  | 373  | 183  | 187  | 306  | -    | 171  | 126  |
| W1527         | Gel     | 410                                           | 124  | 176  | 209  | 135  | 298  | 130  | 550  | 132  | 200  | 145  | 263  | 180  | 148  | 326  | 357  | 180  | 182  | 300  | 270  | 161  | 121  |
|               | Frag    | 395                                           | -    | 182  | 220  | 144  | 308  | 128  | -    | 138  | 209  | -    | 266  | 174  | 150  | -    | 373  | 191  | 189  | 306  | 277  | 169  | 128  |
| W1805         | Gel     | 410                                           | 124  | 176  | 209  | 135  | 298  | 130  | 550  | 132  | 200  | 145  | 263  | 180  | 148  | 326  | 357  | 180  | 182  | 300  | 270  | 161  | 121  |
|               | Frag    | 395                                           | 129  | 181  | 220  | 144  | 308  | 128  | -    | 138  | 208  | 140  | 265  | 174  | 150  | 331  | 372  | 190  | 188  | 306  | -    | 171  | 128  |

(to be continued)



Supplemental Table 1. Continued.

| Accession No. | Method* | Gel fragment size in each INDEL marker (bp)** |      |      |      |      |      |      |      |      |      |      |      |      |      |      |      |      |      |      |      |      |      |
|---------------|---------|-----------------------------------------------|------|------|------|------|------|------|------|------|------|------|------|------|------|------|------|------|------|------|------|------|------|
|               |         | 1                                             | 2    | 2    | 2    | 2    | 3    | 3    | 3    | 4    | 4    | 5    | 5    | 5    | 5    | 5    | 6    | 6    | 6    | 7    | 8    | 9    | 10   |
| W0067         | Gel     | -301                                          | -269 | -308 | -342 | -343 | -128 | -173 | -363 | -276 | -312 | -067 | -070 | -109 | -202 | -277 | -269 | -300 | -306 | -233 | -006 | -037 | -044 |
|               | Frag    | 410                                           | 115  | 176  | 209  | 140  | 420  | 153  | 461  | 360  | 178  | 145  | 320  | 122  | 65   | 326  | 357  | 360  | 120  | 281  | 245  | 363  | 553  |
| W0005         | Gel     | 410                                           | 115  | 176  | 209  | 140  | 420  | 153  | 461  | 360  | 178  | 145  | 320  | 122  | 65   | 326  | 357  | 360  | 120  | 281  | 245  | 363  | 553  |
|               | Frag    | 387                                           | 126  | -    | -    | 143  | 417  | 157  | -    | -    | 367  | 189  | 140  | 326  | 125  | 67   | 335  | 359  | 363  | 120  | 295  | -    | 370  |
| W0615         | Gel     | 410                                           | 115  | 176  | 209  | 140  | 420  | 153  | 461  | 360  | 178  | 145  | 320  | 122  | 65   | 326  | 357  | 360  | 120  | 281  | 245  | 363  | 553  |
|               | Frag    | 387                                           | 126  | -    | 217  | 143  | 416  | 156  | -    | -    | 189  | 140  | 327  | -    | 66   | -    | -    | 364  | 121  | 295  | -    | -    | -    |
| W1356         | Gel     | 410                                           | 115  | 176  | 209  | 140  | 420  | 153  | 461  | 360  | 178  | 145  | 320  | 122  | 65   | 326  | 357  | 360  | 120  | 281  | 245  | 363  | 553  |
|               | Frag    | 387                                           | 126  | -    | 217  | 143  | 416  | 156  | -    | -    | 190  | 139  | 327  | 125  | 66   | -    | -    | 358  | 363  | 121  | 295  | -    | -    |
| W1348         | Gel     | 410                                           | 115  | 176  | 209  | 140  | 420  | 153  | 461  | 360  | 178  | 145  | 320  | 122  | 65   | 326  | 357  | 360  | 120  | 281  | 245  | 363  | 553  |
|               | Frag    | 387                                           | 129  | -    | 217  | 143  | 417  | 157  | -    | -    | 190  | 139  | -    | 122  | 66   | -    | -    | 358  | -    | 121  | -    | -    | -    |
| W1352         | Gel     | 410                                           | 115  | 176  | 209  | 140  | 420  | 153  | 461  | 360  | 178  | 145  | 320  | 122  | 65   | 326  | 357  | 360  | 120  | 281  | 245  | 363  | 553  |
|               | Frag    | 387                                           | 127  | -    | 217  | 143  | -    | 156  | -    | -    | 189  | 140  | -    | -    | 66   | 335  | 358  | 363  | 121  | 295  | -    | -    | -    |
| W1354         | Gel     | 410                                           | 115  | 176  | 209  | 140  | 420  | 153  | 461  | 360  | 178  | 145  | 320  | 122  | 65   | 326  | 357  | 360  | 120  | 281  | 245  | 363  | 553  |
|               | Frag    | 387                                           | 127  | -    | -    | 144  | 416  | 156  | -    | -    | 189  | -    | -    | -    | 66   | -    | -    | 358  | 363  | 121  | 295  | -    | -    |
| W1360         | Gel     | 410                                           | 115  | 176  | 209  | 140  | 420  | 153  | 461  | 360  | 178  | 145  | 320  | 122  | 65   | 326  | 357  | 360  | 120  | 281  | 245  | 363  | 553  |
|               | Frag    | 387                                           | -    | -    | 217  | 144  | 417  | 156  | -    | -    | 191  | 139  | 327  | -    | 66   | 335  | 358  | 363  | 121  | -    | -    | -    | 369  |
| W2068         | Gel     | 410                                           | 115  | 176  | 209  | 140  | 420  | 153  | 461  | 360  | 178  | 145  | 320  | 122  | 65   | 326  | 357  | 360  | 120  | 281  | 245  | 363  | 553  |
|               | Frag    | 387                                           | 124  | -    | 217  | 143  | 417  | 157  | 481  | -    | 189  | 140  | 327  | -    | 67   | 335  | 358  | -    | 121  | 292  | -    | -    | 369  |
| W0001         | Gel     | 296                                           | 120  | 176  | 405  | 120  | 222  | 135  | 430  | 150  | 396  | 135  | 336  | 180  | 130  | 362  | 357  | 180  | 145  | 181  | 410  | 330  | 150  |
|               | Frag    | 300                                           | 130  | -    | -    | 125  | 226  | 138  | -    | -    | 365  | 128  | 336  | -    | 147  | 347  | 358  | 160  | -    | 185  | -    | 331  | 160  |
|               | Gel     | 410                                           | -    | -    | -    | 136  | 298  | -    | 461  | -    | -    | -    | -    | -    | -    | -    | -    | 210  | -    | 350  | -    | -    | -    |
| W0604         | Frag    | -                                             | -    | -    | -    | 140  | -    | -    | -    | -    | -    | -    | -    | -    | -    | -    | -    | 186  | -    | 349  | -    | -    | -    |
|               | Gel     | 296                                           | 120  | 176  | 405  | 120  | 222  | 135  | 430  | 150  | 396  | 135  | 336  | 180  | 130  | 362  | 357  | 210  | 145  | 181  | 410  | 330  | 150  |
|               | Frag    | 300                                           | 129  | -    | -    | 125  | -    | 137  | -    | -    | 360  | 127  | 337  | -    | 147  | -    | 359  | 187  | 140  | -    | -    | -    | -    |
| W2033         | Gel     | 410                                           | -    | -    | -    | 136  | 298  | -    | 461  | -    | -    | -    | -    | -    | -    | -    | -    | -    | -    | 350  | -    | -    | -    |
|               | Frag    | -                                             | -    | -    | -    | 140  | -    | -    | -    | -    | -    | -    | -    | -    | -    | -    | -    | 186  | -    | -    | -    | -    | -    |
|               | Gel     | 296                                           | 120  | 176  | 405  | 120  | 222  | 135  | 430  | 150  | 396  | 135  | 336  | 180  | 130  | 362  | 357  | 180  | 145  | 181  | 410  | 330  | 150  |
| W2035         | Frag    | -                                             | 129  | -    | -    | 125  | 226  | 137  | -    | -    | 365  | 127  | 337  | -    | 147  | -    | 358  | 160  | -    | 185  | -    | -    | 160  |
|               | Gel     | 410                                           | -    | -    | -    | 136  | 298  | -    | 461  | -    | -    | -    | -    | -    | -    | -    | -    | -    | 210  | -    | 350  | -    | -    |
|               | Frag    | -                                             | -    | -    | -    | 140  | -    | -    | -    | -    | -    | -    | -    | -    | -    | -    | -    | 186  | -    | -    | -    | -    | -    |
| W1220         | Gel     | 296                                           | 120  | 176  | 405  | 120  | 222  | 135  | 430  | 150  | 396  | 135  | 336  | 180  | 130  | 362  | 357  | 210  | 150  | 181  | 410  | 330  | 150  |
|               | Frag    | 300                                           | 130  | -    | -    | 125  | -    | 137  | -    | -    | 360  | 127  | 337  | -    | 147  | 347  | 358  | 187  | 139  | 182  | -    | 326  | 160  |
|               | Gel     | 410                                           | -    | -    | -    | 136  | 298  | -    | 461  | -    | -    | -    | -    | -    | -    | -    | -    | -    | -    | 350  | -    | -    | -    |
| W1215         | Frag    | 381                                           | -    | -    | -    | 140  | -    | -    | -    | -    | -    | -    | -    | -    | -    | -    | -    | -    | -    | 349  | -    | -    | -    |
|               | Gel     | 296                                           | 120  | 176  | 405  | 120  | 222  | 135  | 430  | 150  | 396  | 135  | 336  | 180  | 130  | 362  | 357  | 210  | 150  | 181  | 410  | 330  | 150  |
|               | Frag    | 300                                           | 130  | -    | -    | 125  | 227  | 137  | -    | -    | 360  | 127  | 336  | -    | 147  | -    | 187  | 139  | 182  | -    | -    | 326  | 160  |
| W1224         | Gel     | 410                                           | -    | -    | -    | 136  | 298  | -    | 461  | -    | -    | -    | -    | -    | -    | -    | -    | -    | -    | 350  | -    | -    | -    |
|               | Frag    | -                                             | -    | -    | -    | 140  | -    | -    | -    | -    | -    | -    | -    | -    | -    | -    | -    | -    | -    | -    | -    | -    | -    |
|               | Gel     | 296                                           | 120  | 176  | 405  | 120  | 222  | 135  | 430  | 150  | 396  | 135  | 336  | 180  | 130  | 362  | 357  | 210  | 150  | 181  | 410  | 330  | 150  |
| W1228         | Frag    | 300                                           | 130  | 181  | 389  | 125  | 227  | 138  | 424  | 153  | 361  | 128  | 336  | -    | 146  | 347  | 358  | 187  | 142  | 182  | -    | 326  | 160  |
|               | Gel     | 410                                           | -    | -    | -    | 136  | 298  | -    | 461  | -    | -    | -    | -    | -    | -    | -    | -    | -    | -    | 350  | -    | -    | -    |
|               | Frag    | 381                                           | -    | -    | -    | 141  | -    | -    | 472  | -    | -    | -    | -    | -    | -    | -    | -    | -    | -    | -    | -    | -    | -    |

\*: "Gel" and "Frag" indicate that the PCR product sizes are estimated by the agarose gel electrophoresis and the fragment analysis, respectively.

\*\*: "-" indicates that the PCR product sizes are not determined.
